# Supplementary material for: LARP-assisted synthesis of CsBi3I10 perovskite for efficient lead-free solar cells
Source: Royal Society of Chemistry journal article supplement (doi:10.1039/d3ra00365e), 2023-01-01
Supplement: d3ra00365e1.pdf [file d3ra00365e1.pdf]

## LARP-assisted synthesis of CsBi<sub>3</sub>I<sub>10</sub> perovskite for efficient lead-free solar cells

Subbiah Vijaya,<sup>a,1</sup> Subbiah Jegadesan,<sup>b,1,\*</sup> David J. Jones<sup>b</sup> and Sambandam Anandan<sup>a,\*</sup>

<sup>a</sup>*Nanomaterials & Solar Energy Conversion Lab, Department of Chemistry, National Institute of Technology, Tiruchirappalli -620015, India.*

<sup>b</sup>*School of Chemistry, Bio21 Institute, The University of Melbourne, Parkville, Victoria 3010, Australia.*

<sup>1</sup>[Equally Contribute](#)

### Supporting information

Figure S1: XRD pattern of CsBi<sub>3</sub>I<sub>10</sub> film

Figure S2: (a) Absorption spectra of CsBi<sub>3</sub>I<sub>10</sub> film recorded before (at room temperature) and after annealing (100 °C), (b) Photograph of CsBi<sub>3</sub>I<sub>10</sub> film deposited over NiO layer before and, (c) after annealing.

Figure S3: Energy Dispersive X-Ray (EDX) analysis of (a) Cs<sub>3</sub>Bi<sub>2</sub>I<sub>9</sub> (b) CsBi<sub>3</sub>I<sub>10</sub> (after annealing at 100 °C)

Table S1: The comparison table of the performance of CsBi<sub>3</sub>I<sub>10</sub> perovskite-based solar cells

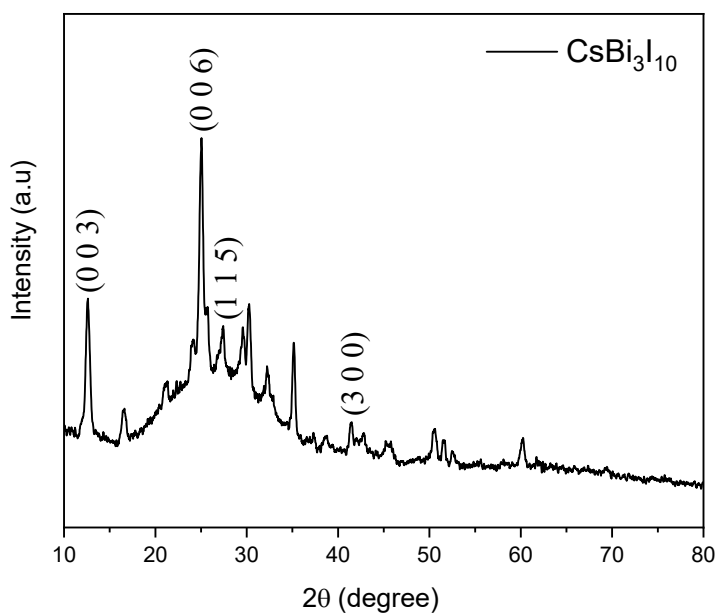

Figure S1 XRD pattern of CsBi<sub>3</sub>I<sub>10</sub> film

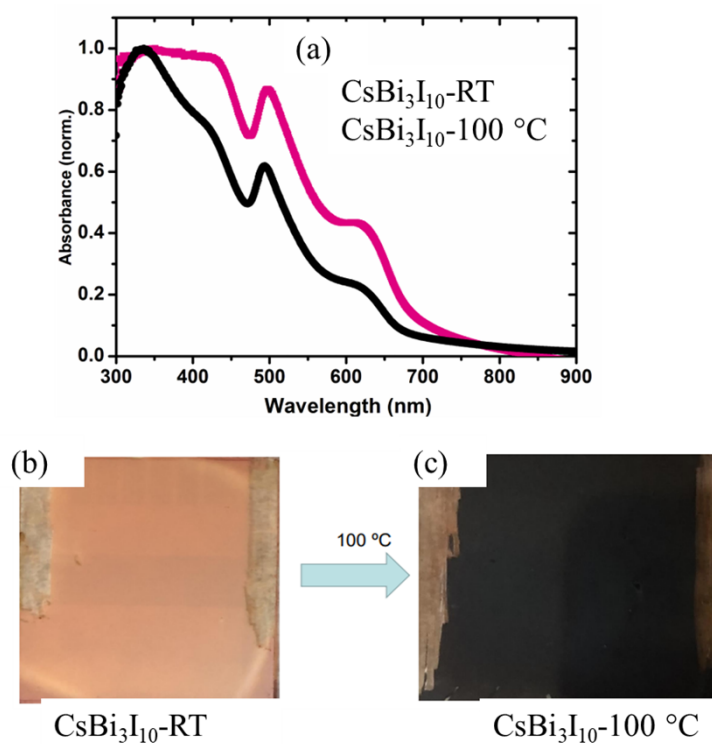

Figure S2 (a) Absorption spectra of CsBi<sub>3</sub>I<sub>10</sub> film recorded before (at room temperature) and after annealing (100 °C), (b) Photograph of CsBi<sub>3</sub>I<sub>10</sub> film deposited over NiO layer before and, (d) after annealing.

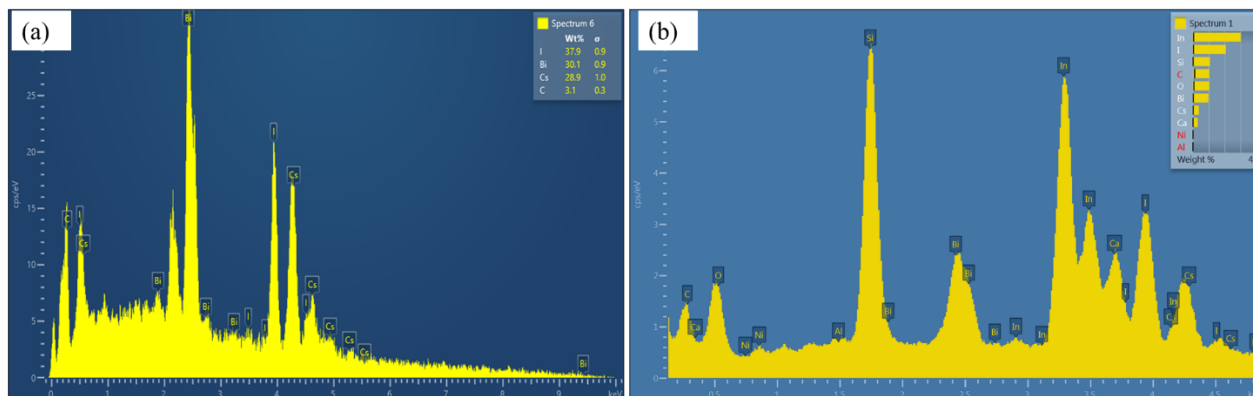

Figure S3 Energy Dispersive X-Ray (EDX) analysis of (a)  $\text{Cs}_3\text{Bi}_2\text{I}_9$  (b)  $\text{CsBi}_3\text{I}_{10}$  (after annealing at  $100\text{ }^\circ\text{C}$ )

Table S1 The comparison table of the performance of CsBi<sub>3</sub>I<sub>10</sub> perovskite-based solar cells reported in the literature.

| Perovskite Material                                                                       | Band gap (eV) | Device Geometry                                                                                      | V <sub>oc</sub> (V) | J <sub>sc</sub> (mA) | PCE (%)    | Ref              |
|-------------------------------------------------------------------------------------------|---------------|------------------------------------------------------------------------------------------------------|---------------------|----------------------|------------|------------------|
| CsBi <sub>3</sub> I <sub>10</sub>                                                         | NA            | ITO/PEDOT/CsBi <sub>3</sub> I <sub>10</sub> /PCBM/BCP/Ag                                             | 0.65                | 4.10                 | 1.18       | 1                |
| CsBi <sub>3</sub> I <sub>10</sub>                                                         | 1.8           | ITO/PTAA/PEDOT:PSS/Cs <sub>3</sub> Bi <sub>2</sub> I <sub>9</sub> /PCBM/Ag                           | 0.74                | 3.42                 | 1.26       | 2                |
| CsBi <sub>3</sub> I <sub>10</sub>                                                         | 1.76          | FTO/TiO <sub>2</sub> /ZrO <sub>2</sub> /ABi <sub>3</sub> I <sub>10</sub> /Carbon                     | 0.46                | 4.75                 | 1.51       | 3                |
| MABi <sub>3</sub> I <sub>10</sub>                                                         | 1.78          |                                                                                                      | 0.47                | 3.40                 | 0.67       |                  |
| FABi <sub>3</sub> I <sub>10</sub>                                                         | 1.81          |                                                                                                      | 0.45                | 3.88                 | 0.87       |                  |
| Cs <sub>3</sub> Bi <sub>2</sub> I <sub>9</sub>                                            | 2.03          | Glass/FTO/TiO <sub>2</sub> /CsBi <sub>3</sub> I <sub>10</sub> /P3HT/Ag                               | 0.26                | 0.18                 | 0.02       | 4                |
| CsBi <sub>3</sub> I <sub>10</sub>                                                         | 1.77          |                                                                                                      | 0.31                | 3.40                 | 0.40       |                  |
| CsBi <sub>3</sub> I <sub>10</sub>                                                         | NA            | FTO/TiO <sub>2</sub> /CsBi <sub>3</sub> I <sub>10</sub> /Spiro-OMeTAD/Ag                             | 0.43                | 1.73                 | 0.32       | 5                |
| CsBi <sub>3</sub> I <sub>10</sub>                                                         | 1.78          | ITO/PEDOT:PSS/CBI/BCP/C60/BCP/Ag                                                                     | 0.67                | 2.46                 | 0.80       | 6                |
| CsBi <sub>3</sub> I <sub>10</sub>                                                         | 1.75          | ITO/PEDOT:PSS/CsBi <sub>3</sub> I <sub>10</sub> /PCBM/BCP/Au                                         | 0.70                | 2.66                 | 0.63       | 7                |
| CsBi <sub>3</sub> I <sub>10</sub>                                                         | 1.75          | FTO/NiO <sub>x</sub> /CsBi <sub>3</sub> I <sub>10</sub> /PCBM/BCP/Au                                 | 0.73                | 2.89                 | 0.72       | 8                |
|                                                                                           |               | FTO/PEDOT:PSS/CsBi <sub>3</sub> I <sub>10</sub> /PCBM/BCP/Au                                         | 0.62                | 2.09                 | 0.37       |                  |
| CsBi <sub>3</sub> I <sub>10</sub>                                                         | 1.78          | glass/FTO/TiO <sub>2</sub> /CsBi <sub>3</sub> I <sub>10</sub> /Spiro-OMeTAD/Ag                       | 0.55                | 4.45                 | 1.03       | 9                |
| CsBi <sub>3</sub> I <sub>10</sub>                                                         | 1.79          | glass/FTO/c-TiO <sub>2</sub> /m-TiO <sub>2</sub> /CsBi <sub>3</sub> I <sub>10</sub> /Spiro-OMeTAD/Ag | 0.38                | 4.86                 | 0.84       | 10               |
| <b>Cs<sub>3</sub>Bi<sub>2</sub>I<sub>9</sub></b><br><b>CsBi<sub>3</sub>I<sub>10</sub></b> | <b>2.05</b>   | <b>ITO/NiO/Perovskite/PC<sub>61</sub>BM/BCP/Ag</b>                                                   | <b>0.62</b>         | <b>2.4</b>           | <b>0.7</b> | <b>This work</b> |
|                                                                                           | <b>1.72</b>   |                                                                                                      | <b>0.79</b>         | <b>4.2</b>           | <b>2.3</b> |                  |

## References

1. Shamsi, J., Urban, A.S., Imran, M., De Trizio, L. and Manna, L., 2019. *Chemical reviews*, 119(5), pp.3296-3348.
2. Khadka, D.B., Shirai, Y., Yanagida, M. and Miyano, K., 2019. *Journal of Materials Chemistry C*, 7(27), pp.8335-8343.
3. Shin, J., Kim, M., Jung, S., Kim, C.S., Park, J., Song, A., Chung, K.B., Jin, S.H., Lee, J.H. and Song, M., 2018. *Nano research*, 11(12), pp.6283-6293.
4. Johansson, M.B., Zhu, H. and Johansson, E.M., 2016. *The journal of physical chemistry letters*, 7(17), pp.3467-3471.
5. Chen, X.Y., Lan, H.B., Liang, G.X. and Fan, P., 2018. In *Photonics for Energy* (pp. PT4B-28). Optica Publishing Group.
6. Karim, M., Matsuishi, K., Chowdhury, T.H., Chowdhury, W.I., Abdel-shakour, M. and Islam, A., 2022. *Journal of Materials Science: Materials in Electronics*, 33(10), pp.8114-8126.
7. Mariyappan, P., Chowdhury, T.H., Subashchandran, S., Bedja, I., Ghaithan, H.M. and Islam, A., 2020. *Sustainable Energy & Fuels*, 4(10), pp.5042-5049.
8. Mariyappan, P., Chowdhury, T.H., Subashchandran, S., Bedja, I., Ghaithan, H.M. and Islam, A., 2021. Applications. *Advanced Materials Interfaces*, 8(7), p.2002083.
9. Liang, G.X., Chen, X.Y., Chen, Z.H., Lan, H.B., Zheng, Z.H., Fan, P., Tian, X.Q., Duan, J.Y., Wei, Y.D. and Su, Z.H., 2019. *The Journal of Physical Chemistry C*, 123(45), pp.27423-27428.
10. Lan, H., Chen, X., Fan, P. and Liang, G., 2021. *Journal of Materials Science: Materials in Electronics*, 32(8), pp.11183-11192.
